# Supplementary material for: Overexpression of Both ERG11 and ABC2 Genes Might Be Responsible for Itraconazole Resistance in Clinical Isolates of Candida krusei
Source: PubMed Central journal article supplement (PMC4550294; doi:10.1371/journal.pone.0136185), 2015-08-26
Supplement: pone.0136185.s002.pdf [file pone.0136185.s002.pdf]

| Position | Sample Name | Gene Name | Cq    | Cq Mean | Cq Error | Gene Type | Replicate | Group    | Ratio    | Ratio Error | Dye          | Failure | Slope | EPF  |
|----------|-------------|-----------|-------|---------|----------|-----------|-----------|----------|----------|-------------|--------------|---------|-------|------|
| A1       | CK1         | ACT1      | 16.23 | 16.07   | 0.2      | Reference | A1        | -        | -        | -           | SYBR Green I | None    | 3.01  | 6.92 |
| A2       | CK1         | ACT1      | 15.85 | 16.07   | 0.2      | Reference | A1        | -        | -        | -           | SYBR Green I | None    | 2.8   | 6.73 |
| A3       | CK1         | ACT1      | 16.12 | 16.07   | 0.2      | Reference | A1        | -        | -        | -           | SYBR Green I | None    | 2.7   | 6.67 |
| A4       | CK2         | ACT1      | 18.14 | 18.3    | 0.15     | Reference | A4        | -        | -        | -           | SYBR Green I | None    | 3.13  | 6.87 |
| A5       | CK2         | ACT1      | 18.44 | 18.3    | 0.15     | Reference | A4        | -        | -        | -           | SYBR Green I | None    | 3.15  | 6.89 |
| A6       | CK2         | ACT1      | 18.33 | 18.3    | 0.15     | Reference | A4        | -        | -        | -           | SYBR Green I | None    | 3.29  | 6.96 |
| A7       | CK4         | ACT1      | 19.13 | 19.12   | 0.12     | Reference | A7        | -        | -        | -           | SYBR Green I | None    | 3.18  | 6.95 |
| A8       | CK4         | ACT1      | 19    | 19.12   | 0.12     | Reference | A7        | -        | -        | -           | SYBR Green I | None    | 3.06  | 6.93 |
| A9       | CK4         | ACT1      | 19.24 | 19.12   | 0.12     | Reference | A7        | -        | -        | -           | SYBR Green I | None    | 3.15  | 7.12 |
| A10      | CK5         | ACT1      | 17.42 | 17.41   | 0.04     | Reference | A10       | -        | -        | -           | SYBR Green I | None    | 2.8   | 6.8  |
| A11      | CK5         | ACT1      | 17.44 | 17.41   | 0.04     | Reference | A10       | -        | -        | -           | SYBR Green I | None    | 2.79  | 6.96 |
| A12      | CK5         | ACT1      | 17.37 | 17.41   | 0.04     | Reference | A10       | -        | -        | -           | SYBR Green I | None    | 2.86  | 6.9  |
| B1       | CK1         | ABC2      | 19.77 | 19.84   | 0.11     | Target    | B1        | 7.68E-02 | 1.04E-02 | -           | SYBR Green I | None    | 3.49  | 6.83 |
| B2       | CK1         | ABC2      | 19.78 | 19.84   | 0.11     | Target    | B1        | 7.62E-02 | 1.03E-02 | -           | SYBR Green I | None    | 3.32  | 6.66 |
| B3       | CK1         | ABC2      | 19.97 | 19.84   | 0.11     | Target    | B1        | 6.68E-02 | 9.06E-03 | -           | SYBR Green I | None    | 3.04  | 6.47 |
| B4       | CK2         | ABC2      | 21.44 | 21.43   | 0.01     | Target    | B4        | 1.14E-01 | 1.20E-02 | -           | SYBR Green I | None    | 3.66  | 6.8  |
| B5       | CK2         | ABC2      | 21.44 | 21.43   | 0.01     | Target    | B4        | 1.14E-01 | 1.20E-02 | -           | SYBR Green I | None    | 3.68  | 6.8  |
| B6       | CK2         | ABC2      | 21.43 | 21.43   | 0.01     | Target    | B4        | 1.15E-01 | 1.20E-02 | -           | SYBR Green I | None    | 3.69  | 6.81 |
| B7       | CK4         | ABC2      | 23.18 | 22.92   | 0.31     | Target    | B7        | 6.00E-02 | 2.94E-02 | -           | SYBR Green I | None    | 3.48  | 6.62 |
| B8       | CK4         | ABC2      | 23    | 22.92   | 0.31     | Target    | B7        | 6.79E-02 | 3.33E-02 | -           | SYBR Green I | None    | 3.56  | 6.72 |
| B9       | CK4         | ABC2      | 22.58 | 22.92   | 0.31     | Target    | B7        | 9.09E-02 | 4.46E-02 | -           | SYBR Green I | None    | 3.64  | 6.75 |
| B10      | CK5         | ABC2      | 20.86 | 20.88   | 0.08     | Target    | B10       | 9.12E-02 | 2.27E-02 | -           | SYBR Green I | None    | 3.12  | 6.57 |
| B11      | CK5         | ABC2      | 20.81 | 20.88   | 0.08     | Target    | B10       | 9.44E-02 | 2.35E-02 | -           | SYBR Green I | None    | 3.04  | 6.41 |
| B12      | CK5         | ABC2      | 20.96 | 20.88   | 0.08     | Target    | B10       | 8.51E-02 | 2.12E-02 | -           | SYBR Green I | None    | 3.28  | 6.61 |
| C1       | CK6         | ACT1      | 17    | 16.86   | 0.15     | Reference | C1        | -        | -        | -           | SYBR Green I | None    | 3.24  | 7.03 |
| C2       | CK6         | ACT1      | 16.71 | 16.86   | 0.15     | Reference | C1        | -        | -        | -           | SYBR Green I | None    | 3.04  | 6.95 |
| C3       | CK6         | ACT1      | 16.86 | 16.86   | 0.15     | Reference | C1        | -        | -        | -           | SYBR Green I | None    | 2.86  | 6.78 |
| C4       | CK8         | ACT1      | 18.76 | 18.78   | 0.21     | Reference | C4        | -        | -        | -           | SYBR Green I | None    | 3.03  | 6.82 |
| C5       | CK8         | ACT1      | 19    | 18.78   | 0.21     | Reference | C4        | -        | -        | -           | SYBR Green I | None    | 3.09  | 6.93 |
| C6       | CK8         | ACT1      | 18.58 | 18.78   | 0.21     | Reference | C4        | -        | -        | -           | SYBR Green I | None    | 3.03  | 6.76 |
| C7       | CK9         | ACT1      | 19.03 | 18.85   | 0.19     | Reference | C7        | -        | -        | -           | SYBR Green I | None    | 2.61  | 6.59 |
| C8       | CK9         | ACT1      | 18.65 | 18.85   | 0.19     | Reference | C7        | -        | -        | -           | SYBR Green I | None    | 2.88  | 6.85 |
| C9       | CK9         | ACT1      | 18.87 | 18.85   | 0.19     | Reference | C7        | -        | -        | -           | SYBR Green I | None    | 2.98  | 6.93 |
| C10      | CK10        | ACT1      | 19.14 | 19.18   | 0.04     | Reference | C10       | -        | -        | -           | SYBR Green I | None    | 3.16  | 6.92 |
| C11      | CK10        | ACT1      | 19.22 | 19.18   | 0.04     | Reference | C10       | -        | -        | -           | SYBR Green I | None    | 3.27  | 7.06 |
| C12      | CK10        | ACT1      | 19.19 | 19.18   | 0.04     | Reference | C10       | -        | -        | -           | SYBR Green I | None    | 3.03  | 6.85 |
| D1       | CK6         | ABC2      | 20.99 | 21.17   | 0.16     | Target    | D1        | 5.70E-02 | 5.73E-03 | -           | SYBR Green I | None    | 3.44  | 6.71 |
| D2       | CK6         | ABC2      | 21.2  | 21.17   | 0.16     | Target    | D1        | 4.93E-02 | 4.95E-03 | -           | SYBR Green I | None    | 3.48  | 6.73 |
| D3       | CK6         | ABC2      | 21.31 | 21.17   | 0.16     | Target    | D1        | 4.57E-02 | 4.59E-03 | -           | SYBR Green I | None    | 3.61  | 6.72 |
| D4       | CK8         | ABC2      | 21.87 | 21.86   | 0.17     | Target    | D4        | 1.19E-01 | 1.60E-02 | -           | SYBR Green I | None    | 3.61  | 6.72 |
| D5       | CK8         | ABC2      | 21.69 | 21.86   | 0.17     | Target    | D4        | 1.33E-01 | 1.94E-02 | -           | SYBR Green I | None    | 3.25  | 6.53 |
| D6       | CK8         | ABC2      | 22.03 | 21.86   | 0.17     | Target    | D4        | 1.05E-01 | 1.54E-02 | -           | SYBR Green I | None    | 3.37  | 6.57 |
| D7       | CK9         | ABC2      | 21.29 | 21.74   | 0.45     | Target    | D7        | 1.84E-01 | 2.44E-02 | -           | SYBR Green I | None    | 3.11  | 6.49 |
| D8       | CK9         | ABC2      | 21.75 | 21.74   | 0.45     | Target    | D7        | 1.42E-01 | 1.88E-02 | -           | SYBR Green I | None    | 3.45  | 5.36 |
| D9       | CK9         | ABC2      | 22.18 | 21.74   | 0.45     | Target    | D7        | 9.94E-02 | 1.32E-02 | -           | SYBR Green I | None    | 3.34  | 6.57 |
| D10      | CK10        | ABC2      | 21.51 | 21.29   | 0.21     | Target    | D10       | 1.99E-01 | 5.78E-02 | -           | SYBR Green I | None    | 3.66  | 6.8  |
| D11      | CK10        | ABC2      | 21.09 | 21.29   | 0.21     | Target    | D10       | 2.66E-01 | 7.74E-02 | -           | SYBR Green I | None    | 3.93  | 6.96 |
| D12      | CK10        | ABC2      | 21.26 | 21.29   | 0.21     | Target    | D10       | 2.37E-01 | 6.88E-02 | -           | SYBR Green I | None    | 3.17  | 6.52 |
| E1       | CK11        | ACT1      | 18.86 | 18.91   | 0.05     | Reference | E1        | -        | -        | -           | SYBR Green I | None    | 3.23  | 6.97 |
| E2       | CK11        | ACT1      | 18.92 | 18.91   | 0.05     | Reference | E1        | -        | -        | -           | SYBR Green I | None    | 2.54  | 6.56 |
| E3       | CK11        | ACT1      | 18.96 | 18.91   | 0.05     | Reference | E1        | -        | -        | -           | SYBR Green I | None    | 2.93  | 6.81 |
| E4       | CK12        | ACT1      | 15.93 | 15.83   | 0.11     | Reference | E4        | -        | -        | -           | SYBR Green I | None    | 2.93  | 6.81 |
| E5       | CK12        | ACT1      | 15.84 | 15.83   | 0.11     | Reference | E4        | -        | -        | -           | SYBR Green I | None    | 3.04  | 6.9  |
| E6       | CK12        | ACT1      | 15.72 | 15.83   | 0.11     | Reference | E4        | -        | -        | -           | SYBR Green I | None    | 3.04  | 6.9  |
| E7       | CK13        | ACT1      | 18.81 | 18.62   | 0.2      | Reference | E7        | -        | -        | -           | SYBR Green I | None    | 2.64  | 6.86 |
| E8       | CK13        | ACT1      | 18.41 | 18.62   | 0.2      | Reference | E7        | -        | -        | -           | SYBR Green I | None    | 2.9   | 6.8  |
| E9       | CK13        | ACT1      | 18.65 | 18.62   | 0.2      | Reference | E7        | -        | -        | -           | SYBR Green I | None    | 2.84  | 6.93 |
| E10      | CK14        | ACT1      | 17.29 | 17.31   | 0.02     | Reference | E10       | -        | -        | -           | SYBR Green I | None    | 2.89  | 6.95 |
| E11      | CK14        | ACT1      | 17.32 | 17.31   | 0.02     | Reference | E10       | -        | -        | -           | SYBR Green I | None    | 2.84  | 6.93 |
| E12      | CK14        | ACT1      | 17.31 | 17.31   | 0.02     | Reference | E10       | -        | -        | -           | SYBR Green I | None    | 2.74  | 6.88 |
| F1       | CK11        | ABC2      | 21.68 | 21.82   | 0.16     | Target    | F1        | 1.47E-01 | 4.88E-02 | -           | SYBR Green I | None    | 3.4   | 6.56 |
| F2       | CK11        | ABC2      | 21.78 | 21.82   | 0.16     | Target    | F1        | 1.37E-01 | 4.56E-02 | -           | SYBR Green I | None    | 3.23  | 6.46 |
| F3       | CK11        | ABC2      | 22    | 21.82   | 0.16     | Target    | F1        | 1.17E-01 | 3.91E-02 | -           | SYBR Green I | None    | 3.2   | 6.42 |
| F4       | CK12        | ABC2      | 18.79 | 18.78   | 0.11     | Target    | F4        | 1.39E-01 | 2.58E-02 | -           | SYBR Green I | None    | 3.04  | 6.51 |
| F5       | CK12        | ABC2      | 18.67 | 18.78   | 0.11     | Target    | F4        | 1.20E-01 | 4.19E-02 | -           | SYBR Green I | None    | 2.28  | 6.01 |
| F6       | CK12        | ABC2      | 18.88 | 18.78   | 0.11     | Target    | F4        | 1.30E-01 | 3.62E-02 | -           | SYBR Green I | None    | 3.47  | 6.75 |
| F7       | CK13        | ABC2      | 21.83 | 22.28   | 0.44     | Target    | F7        | 1.08E-01 | 1.51E-02 | -           | SYBR Green I | None    | 3.14  | 6.51 |
| F8       | CK13        | ABC2      | 22.71 | 22.28   | 0.44     | Target    | F7        | 5.89E-02 | 8.21E-03 | -           | SYBR Green I | None    | 3.44  | 6.78 |
| F9       | CK13        | ABC2      | 22.3  | 22.28   | 0.44     | Target    | F7        | 7.82E-02 | 1.09E-02 | -           | SYBR Green I | None    | 3.46  | 6.74 |
| F10      | CK14        | ABC2      | 22.55 | 22.46   | 0.08     | Target    | F10       | 2.63E-02 | 2.73E-03 | -           | SYBR Green I | None    | 3.31  | 6.45 |
| F11      | CK14        | ABC2      | 22.44 | 22.46   | 0.08     | Target    | F10       | 2.84E-02 | 3.05E-03 | -           | SYBR Green I | None    | 3.05  | 6.3  |
| F12      | CK14        | ABC2      | 22.4  | 22.46   | 0.08     | Target    | F10       | 2.92E-02 | 3.29E-03 | -           | SYBR Green I | None    | 3.3   | 6.4  |
| G1       | CK15        | ACT1      | 19.35 | 19.29   | 0.16     | Reference | G1        | -        | -        | -           | SYBR Green I | None    | 2.85  | 6.93 |
| G2       | CK15        | ACT1      | 19.41 | 19.29   | 0.16     | Reference | G1        | -        | -        | -           | SYBR Green I | None    | 3.02  | 6.91 |
| G3       | CK15        | ACT1      | 19.1  | 19.29   | 0.16     | Reference | G1        | -        | -        | -           | SYBR Green I | None    | 2.89  | 6.73 |
| G4       | CK16        | ACT1      | 17.78 | 18.06   | 0.25     | Reference | G4        | -        | -        | -           | SYBR Green I | None    | 3.06  | 6.84 |
| G5       | CK16        | ACT1      | 18.21 | 18.06   | 0.25     | Reference | G4        | -        | -        | -           | SYBR Green I | None    | 2.74  | 6.77 |
| G6       | CK16        | ACT1      | 18.2  | 18.06   | 0.25     | Reference | G4        | -        | -        | -           | SYBR Green I | None    | 2.7   | 6.71 |
| G7       | CK17        | ACT1      | 18.15 | 18.25   | 0.1      | Reference | G7        | -        | -        | -           | SYBR Green I | None    | 3.12  | 6.91 |
| G8       | CK17        | ACT1      | 18.27 | 18.25   | 0.1      | Reference | G7        | -        | -        | -           | SYBR Green I | None    | 3.14  | 6.96 |
| G9       | CK17        | ACT1      | 18.34 | 18.25   | 0.1      | Reference | G7        | -        | -        | -           | SYBR Green I | None    | 3.16  | 6.87 |
| G10      | CK18        | ACT1      | 18.04 | 18.3    | 0.25     | Reference | G10       | -        | -        | -           | SYBR Green I | None    | 2.57  | 6.67 |
| G11      | CK18        | ACT1      | 18.34 | 18.3    | 0.25     | Reference | G10       | -        | -        | -           | SYBR Green I | None    | 3.08  | 6.58 |
| G12      | CK18        | ACT1      | 18.53 | 18.3    | 0.25     | Reference | G10       | -        | -        | -           | SYBR Green I | None    | 2.92  | 6.94 |
| H1       | CK15        | ABC2      | 23.85 | 23.91   | 0.18     | Target    | H1        | 4.23E-02 | 4.82E-03 | -           | SYBR Green I | None    | 3.42  | 6.54 |
| H2       | CK15        | ABC2      | 23.77 | 23.91   | 0.18     | Target    | H1        | 4.47E-02 | 5.10E-03 | -           | SYBR Green I | None    | 3.44  | 6.58 |
| H3       | CK15        | ABC2      | 24.11 | 23.91   | 0.18     | Target    | H1        | 3.53E-02 | 4.03E-03 | -           | SYBR Green I | None    | 2.98  | 6.28 |
| H4       | CK16        | ABC2      | 27.95 | 25.64   | 2.32     | Target    | H4        | 1.06E-03 | 1.80E-04 | -           | SYBR Green I | None    | 3.77  | 6.87 |
| H5       | CK16        | ABC2      | 25.65 | 25.64   | 2.32     | Target    | H4        | 1.37E-02 | 2.45E-03 | -           | SYBR Green I | None    | 3.7   | 6.31 |
| H6       | CK16        | ABC2      | 23.32 | 25.64   | 2.32     | Target    | H4        | 2.62E-02 | 4.45E-03 | -           | SYBR Green I | None    | 3.23  | 6.47 |
| H7       | CK17        | ABC2      | 22.4  | 22.48   | 0.08     | Target    | H7        | 5.61E-02 | 6.25E-03 | -           | SYBR Green I | None    | 3.55  | 6.69 |
| H8       | CK17        | ABC2      | 22.49 | 22.48   | 0.08     | Target    | H7        | 5.02E-02 | 5.45E-03 | -           | SYBR Green I | None    | 3.72  | 6.68 |
| H9       | CK17        | ABC2      | 22.56 | 22.48   | 0.08     | Target    | H7        | 5.33E-02 | 5.78E-03 | -           | SYBR Green I | None    | 3.53  | 6.65 |
| H10      | CK18        | ABC2      | 23.5  | 23.37   | 0.18     | Target    | H10       | 2.69E-02 | 3.12E-03 | -           | SYBR Green I | None    | 3.15  | 6.41 |
| H11      | CK18        | ABC2      | 23.44 | 23.37   | 0.18     | Target    | H10       | 2.81E-02 | 3.28E-03 | -           | SYBR Green I | None    | 3.39  | 6.58 |
| H12      | CK18        | ABC2      | 23.17 | 23.37   | 0.18     | Target    | H10       | 3.38E-02 | 3.54E-03 | -           | SYBR Green I | None    | 3.45  | 6.66 |
