# Supplementary material for: Overexpression of Both ERG11 and ABC2 Genes Might Be Responsible for Itraconazole Resistance in Clinical Isolates of Candida krusei
Source: PubMed Central journal article supplement (PMC4550294; doi:10.1371/journal.pone.0136185), 2015-08-26
Supplement: pone.0136185.s003.pdf [file pone.0136185.s003.pdf]

| Position | Sample Name | Gene Name | Cq    | Cq Mean | Cq Error | Gene Type | Replicate | Group | Ratio    | Ratio Error | Dye          | Failure | Slope | EPF  |
|----------|-------------|-----------|-------|---------|----------|-----------|-----------|-------|----------|-------------|--------------|---------|-------|------|
| A1       | CK1         | ACT1      | 18.55 | 18.56   | 0.01     | Reference | A1        |       | -        | -           | SYBR Green I | None    | 2.47  | 6.83 |
| A2       | CK1         | ACT1      | 18.57 | 18.56   | 0.01     | Reference | A1        |       | -        | -           | SYBR Green I | None    | 2.83  | 6.55 |
| A3       | CK1         | ACT1      | 18.57 | 18.56   | 0.01     | Reference | A1        |       | -        | -           | SYBR Green I | None    | 2.17  | 6.18 |
| A4       | CK2         | ACT1      | 18.75 | 18.65   | 0.16     | Reference | A4        |       | -        | -           | SYBR Green I | None    | 2.99  | 6.96 |
| A5       | CK2         | ACT1      | 18.73 | 18.65   | 0.16     | Reference | A4        |       | -        | -           | SYBR Green I | None    | 3.17  | 6.83 |
| A6       | CK2         | ACT1      | 18.46 | 18.65   | 0.16     | Reference | A4        |       | -        | -           | SYBR Green I | None    | 3.02  | 6.75 |
| A7       | CK4         | ACT1      | 18.66 | 18.9    | 0.21     | Reference | A7        |       | -        | -           | SYBR Green I | None    | 2.98  | 6.99 |
| A8       | CK4         | ACT1      | 19.01 | 18.9    | 0.21     | Reference | A7        |       | -        | -           | SYBR Green I | None    | 3.08  | 6.82 |
| A9       | CK4         | ACT1      | 19.02 | 18.9    | 0.21     | Reference | A7        |       | -        | -           | SYBR Green I | None    | 2.87  | 6.61 |
| A10      | CK5         | ACT1      | 15.94 | 15.97   | 0.06     | Reference | A10       |       | -        | -           | SYBR Green I | None    | 2.9   | 6.87 |
| A11      | CK5         | ACT1      | 15.93 | 15.97   | 0.06     | Reference | A10       |       | -        | -           | SYBR Green I | None    | 2.8   | 6.49 |
| A12      | CK5         | ACT1      | 16.03 | 15.97   | 0.06     | Reference | A10       |       | -        | -           | SYBR Green I | None    | 2.67  | 6.45 |
| B1       | CK1         | ERG11     | 22.95 | 22.94   | 0.14     | Target    | B1        |       | 4.36E-02 | 5.34E-03    | SYBR Green I | None    | 2.66  | 6.03 |
| B2       | CK1         | ERG11     | 23.08 | 22.94   | 0.14     | Target    | B1        |       | 5.29E-02 | 5.87E-03    | SYBR Green I | None    | 2.79  | 6.14 |
| B3       | CK1         | ERG11     | 22.8  | 22.94   | 0.14     | Target    | B1        |       | 4.85E-02 | 5.13E-03    | SYBR Green I | None    | 2.65  | 6.03 |
| B4       | CK2         | ERG11     | 22.85 | 22.95   | 0.1      | Target    | B4        |       | 5.43E-02 | 6.09E-03    | SYBR Green I | None    | 2.89  | 6.22 |
| B5       | CK2         | ERG11     | 22.96 | 22.95   | 0.1      | Target    | B4        |       | 5.03E-02 | 5.65E-03    | SYBR Green I | None    | 2.96  | 6.25 |
| B6       | CK2         | ERG11     | 23.05 | 22.95   | 0.1      | Target    | B4        |       | 4.73E-02 | 5.31E-03    | SYBR Green I | None    | 2.81  | 6.34 |
| B7       | CK4         | ERG11     | 23.38 | 23.36   | 0.36     | Target    | B7        |       | 4.70E-02 | 5.28E-03    | SYBR Green I | None    | 2.89  | 6.22 |
| B8       | CK4         | ERG11     | 23    | 23.36   | 0.36     | Target    | B7        |       | 5.82E-02 | 8.27E-03    | SYBR Green I | None    | 2.94  | 6.31 |
| B9       | CK4         | ERG11     | 23.71 | 23.36   | 0.36     | Target    | B7        |       | 3.56E-02 | 5.05E-03    | SYBR Green I | None    | 3.04  | 6.35 |
| B10      | CK5         | ERG11     | 20.4  | 20.23   | 0.25     | Target    | B10       |       | 4.63E-02 | 1.77E-03    | SYBR Green I | None    | 2.95  | 6.38 |
| B11      | CK5         | ERG11     | 20.35 | 20.23   | 0.25     | Target    | B10       |       | 4.79E-02 | 1.83E-03    | SYBR Green I | None    | 2.85  | 6.3  |
| B12      | CK5         | ERG11     | 19.95 | 20.23   | 0.25     | Target    | B10       |       | 6.32E-02 | 2.41E-03    | SYBR Green I | None    | 2.6   | 6.07 |
| C1       | CK6         | ACT1      | 17.67 | 17.85   | 0.25     | Reference | C1        |       | -        | -           | SYBR Green I | None    | 2.82  | 6.81 |
| C2       | CK6         | ACT1      | 17.74 | 17.85   | 0.25     | Reference | C1        |       | -        | -           | SYBR Green I | None    | 2.72  | 6.66 |
| C3       | CK6         | ACT1      | 18.13 | 17.85   | 0.25     | Reference | C1        |       | -        | -           | SYBR Green I | None    | 2.46  | 6.83 |
| C4       | CK8         | ACT1      | 18.72 | 18.85   | 0.12     | Reference | C4        |       | -        | -           | SYBR Green I | None    | 2.5   | 6.7  |
| C5       | CK8         | ACT1      | 18.95 | 18.85   | 0.12     | Reference | C4        |       | -        | -           | SYBR Green I | None    | 2.58  | 6.91 |
| C6       | CK8         | ACT1      | 18.88 | 18.85   | 0.12     | Reference | C4        |       | -        | -           | SYBR Green I | None    | 2.76  | 7.01 |
| C7       | CK9         | ACT1      | 19.25 | 19.23   | 0.27     | Reference | C7        |       | -        | -           | SYBR Green I | None    | 2.83  | 6.95 |
| C8       | CK9         | ACT1      | 18.96 | 19.23   | 0.27     | Reference | C7        |       | -        | -           | SYBR Green I | None    | 3.02  | 6.69 |
| C9       | CK9         | ACT1      | 19.49 | 19.23   | 0.27     | Reference | C7        |       | -        | -           | SYBR Green I | None    | 2.96  | 7.01 |
| C10      | CK10        | ACT1      | -     | -       | -        | Reference | C10       |       | -        | -           | SYBR Green I | Failure | 0.12  | 0.52 |
| C11      | CK10        | ACT1      | 18.63 | 18.97   | 0.48     | Reference | C10       |       | -        | -           | SYBR Green I | None    | 3.06  | 6.6  |
| C12      | CK10        | ACT1      | 19.31 | 18.97   | 0.48     | Reference | C10       |       | -        | -           | SYBR Green I | None    | 3.07  | 7.05 |
| D1       | CK6         | ERG11     | 21.63 | 21.5    | 0.2      | Target    | D1        |       | 7.26E-02 | 1.25E-02    | SYBR Green I | None    | 2.9   | 6.3  |
| D2       | CK6         | ERG11     | 21.59 | 21.5    | 0.2      | Target    | D1        |       | 7.47E-02 | 1.28E-02    | SYBR Green I | None    | 2.81  | 6.21 |
| D3       | CK6         | ERG11     | 21.27 | 21.5    | 0.2      | Target    | D1        |       | 9.32E-02 | 1.60E-02    | SYBR Green I | None    | 2.64  | 6.07 |
| D4       | CK8         | ERG11     | 22.39 | 22.24   | 0.14     | Target    | D4        |       | 8.60E-02 | 7.03E-03    | SYBR Green I | None    | 2.77  | 6.26 |
| D5       | CK8         | ERG11     | 22.12 | 22.24   | 0.14     | Target    | D4        |       | 1.04E-01 | 8.47E-03    | SYBR Green I | None    | 2.73  | 6.13 |
| D6       | CK8         | ERG11     | 22.22 | 22.24   | 0.14     | Target    | D4        |       | 9.67E-02 | 7.90E-03    | SYBR Green I | None    | 2.78  | 6.2  |
| D7       | CK9         | ERG11     | 22.41 | 22.51   | 0.1      | Target    | D7        |       | 1.11E-01 | 2.03E-02    | SYBR Green I | None    | 2.81  | 6.19 |
| D8       | CK9         | ERG11     | 22.51 | 22.51   | 0.1      | Target    | D7        |       | 1.03E-01 | 1.90E-02    | SYBR Green I | None    | 2.76  | 6.15 |
| D9       | CK9         | ERG11     | 22.6  | 22.51   | 0.1      | Target    | D7        |       | 9.70E-02 | 1.78E-02    | SYBR Green I | None    | 2.84  | 6.23 |
| D10      | CK10        | ERG11     | 21.63 | 21.57   | 0.06     | Target    | D10       |       | 1.58E-01 | 2.45E-02    | SYBR Green I | None    | 3.03  | 6.34 |
| D11      | CK10        | ERG11     | 21.53 | 21.57   | 0.06     | Target    | D10       |       | 1.70E-01 | 2.98E-02    | SYBR Green I | None    | 2.83  | 6.19 |
| D12      | CK10        | ERG11     | 21.54 | 21.57   | 0.06     | Target    | D10       |       | 1.68E-01 | 2.37E-02    | SYBR Green I | None    | 2.95  | 6.26 |
| E1       | CK11        | ACT1      | 18.57 | 19.12   | 0.51     | Reference | E1        |       | -        | -           | SYBR Green I | None    | 2.88  | 6.89 |
| E2       | CK11        | ACT1      | 19.59 | 19.12   | 0.51     | Reference | E1        |       | -        | -           | SYBR Green I | None    | 2.73  | 7.01 |
| E3       | CK11        | ACT1      | 19.2  | 19.12   | 0.51     | Reference | E1        |       | -        | -           | SYBR Green I | None    | 2.44  | 6.81 |
| E4       | CK12        | ACT1      | 18.42 | 18.59   | 0.18     | Reference | E4        |       | -        | -           | SYBR Green I | None    | 2.5   | 6.65 |
| E5       | CK12        | ACT1      | 18.57 | 18.59   | 0.18     | Reference | E4        |       | -        | -           | SYBR Green I | None    | 2.75  | 6.7  |
| E6       | CK12        | ACT1      | 18.77 | 18.59   | 0.18     | Reference | E4        |       | -        | -           | SYBR Green I | None    | 2.82  | 6.92 |
| E7       | CK13        | ACT1      | 16.84 | 17.56   | 0.72     | Reference | E7        |       | -        | -           | SYBR Green I | None    | 2.67  | 6.52 |
| E8       | CK13        | ACT1      | 18.27 | 17.56   | 0.72     | Reference | E7        |       | -        | -           | SYBR Green I | None    | 2.67  | 6.94 |
| E9       | CK13        | ACT1      | 17.57 | 17.56   | 0.72     | Reference | E7        |       | -        | -           | SYBR Green I | None    | 2.84  | 6.82 |
| E10      | CK14        | ACT1      | 17.13 | 17.25   | 0.12     | Reference | E10       |       | -        | -           | SYBR Green I | None    | 3.11  | 6.11 |
| E11      | CK14        | ACT1      | 17.37 | 17.25   | 0.12     | Reference | E10       |       | -        | -           | SYBR Green I | None    | 2.92  | 5.68 |
| E12      | CK14        | ACT1      | 17.25 | 17.25   | 0.12     | Reference | E10       |       | -        | -           | SYBR Green I | None    | 2.63  | 6.79 |
| F1       | CK11        | ERG11     | 21.94 | 21.84   | 0.12     | Target    | F1        |       | 1.42E-01 | 5.05E-02    | SYBR Green I | None    | 2.85  | 6.26 |
| F2       | CK11        | ERG11     | 21.71 | 21.84   | 0.12     | Target    | F1        |       | 1.66E-01 | 5.93E-02    | SYBR Green I | None    | 2.81  | 6.25 |
| F3       | CK11        | ERG11     | 21.86 | 21.84   | 0.12     | Target    | F1        |       | 1.50E-01 | 5.34E-02    | SYBR Green I | None    | 2.67  | 6.09 |
| F4       | CK12        | ERG11     | 22.33 | 22.11   | 0.2      | Target    | F4        |       | 7.47E-02 | 9.09E-03    | SYBR Green I | None    | 2.63  | 6.04 |
| F5       | CK12        | ERG11     | 21.94 | 22.11   | 0.2      | Target    | F4        |       | 9.79E-02 | 1.19E-02    | SYBR Green I | None    | 2.73  | 6.14 |
| F6       | CK12        | ERG11     | 22.06 | 22.11   | 0.2      | Target    | F4        |       | 9.00E-02 | 1.10E-02    | SYBR Green I | None    | 2.9   | 6.26 |
| F7       | CK13        | ERG11     | 22.01 | 22.13   | 0.13     | Target    | F7        |       | 4.58E-02 | 2.27E-02    | SYBR Green I | None    | 2.77  | 6.2  |
| F8       | CK13        | ERG11     | 22.26 | 22.13   | 0.13     | Target    | F7        |       | 3.85E-02 | 1.91E-02    | SYBR Green I | None    | 2.69  | 6.07 |
| F9       | CK13        | ERG11     | 22.13 | 22.13   | 0.13     | Target    | F7        |       | 4.21E-02 | 2.09E-02    | SYBR Green I | None    | 2.7   | 6.1  |
| F10      | CK14        | ERG11     | 23.58 | 23.61   | 0.03     | Target    | F10       |       | 1.24E-02 | 1.45E-03    | SYBR Green I | None    | 2.78  | 6.13 |
| F11      | CK14        | ERG11     | 23.63 | 23.61   | 0.03     | Target    | F10       |       | 1.20E-02 | 1.46E-03    | SYBR Green I | None    | 2.79  | 6.15 |
| F12      | CK14        | ERG11     | 23.62 | 23.61   | 0.03     | Target    | F10       |       | 1.23E-02 | 1.45E-03    | SYBR Green I | None    | 2.78  | 6.11 |
| G1       | CK15        | ACT1      | 18.82 | 19.05   | 0.2      | Reference | G1        |       | -        | -           | SYBR Green I | None    | 2.98  | 6.67 |
| G2       | CK15        | ACT1      | 19.12 | 19.05   | 0.2      | Reference | G1        |       | -        | -           | SYBR Green I | None    | 2.96  | 6.67 |
| G3       | CK15        | ACT1      | 19.2  | 19.05   | 0.2      | Reference | G1        |       | -        | -           | SYBR Green I | None    | 2.95  | 6.65 |
| G4       | CK16        | ACT1      | 16.44 | 16.43   | 0.31     | Reference | G4        |       | -        | -           | SYBR Green I | None    | 2.77  | 6.88 |
| G5       | CK16        | ACT1      | 16.11 | 16.43   | 0.31     | Reference | G4        |       | -        | -           | SYBR Green I | None    | 2.87  | 6.61 |
| G6       | CK16        | ACT1      | 16.73 | 16.43   | 0.31     | Reference | G4        |       | -        | -           | SYBR Green I | None    | 2.74  | 6.89 |
| G7       | CK17        | ACT1      | 16.27 | 16.52   | 0.26     | Reference | G7        |       | -        | -           | SYBR Green I | None    | 3.01  | 7.07 |
| G8       | CK17        | ACT1      | 16.5  | 16.52   | 0.26     | Reference | G7        |       | -        | -           | SYBR Green I | None    | 2.9   | 6.79 |
| G9       | CK17        | ACT1      | 16.78 | 16.52   | 0.26     | Reference | G7        |       | -        | -           | SYBR Green I | None    | 2.67  | 6.97 |
| G10      | CK18        | ACT1      | 18.68 | 18.58   | 0.26     | Reference | G10       |       | -        | -           | SYBR Green I | None    | 2.94  | 7.04 |
| G11      | CK18        | ACT1      | 18.28 | 18.58   | 0.26     | Reference | G10       |       | -        | -           | SYBR Green I | None    | 3.05  | 6.64 |
| G12      | CK18        | ACT1      | 18.77 | 18.58   | 0.26     | Reference | G10       |       | -        | -           | SYBR Green I | None    | 3.18  | 6.93 |
| H1       | CK15        | ERG11     | 24.52 | 24.51   | 0.08     | Target    | H1        |       | 2.29E-02 | 3.64E-03    | SYBR Green I | None    | 2.95  | 6.23 |
| H2       | CK15        | ERG11     | 24.43 | 24.51   | 0.08     | Target    | H1        |       | 2.40E-02 | 3.33E-03    | SYBR Green I | None    | 2.82  | 6.15 |
| H3       | CK15        | ERG11     | 24.58 | 24.51   | 0.08     | Target    | H1        |       | 2.16E-02 | 3.00E-03    | SYBR Green I | None    | 2.72  | 6.11 |
| H4       | CK16        | ERG11     | 22.14 | 22.02   | 0.1      | Target    | H4        |       | 1.91E-02 | 4.10E-03    | SYBR Green I | None    | 2.61  | 6.06 |
| H5       | CK16        | ERG11     | 21.94 | 22.02   | 0.1      | Target    | H4        |       | 2.19E-02 | 4.71E-03    | SYBR Green I | None    | 2.85  | 6.24 |
| H6       | CK16        | ERG11     | 21.99 | 22.02   | 0.1      | Target    | H4        |       | 2.12E-02 | 4.55E-03    | SYBR Green I | None    | 2.82  | 6.21 |
| H7       | CK17        | ERG11     | 21.22 | 21.49   | 0.27     | Target    | H7        |       | 3.84E-02 | 6.80E-03    | SYBR Green I | None    | 2.92  | 6.29 |
| H8       | CK17        | ERG11     | 21.75 | 21.49   | 0.27     | Target    | H7        |       | 2.66E-02 | 4.71E-03    | SYBR Green I | None    | 2.93  | 6.27 |
| H9       | CK17        | ERG11     | 21.51 | 21.49   | 0.27     | Target    | H7        |       | 3.26E-02 | 5.43E-03    | SYBR Green I | None    | 3.1   | 6.27 |
| H10      | CK18        | ERG11     | 23.79 | 23.62   | 0.22     | Target    | H10       |       | 2.70E-02 | 4.87E-03    | SYBR Green I | None    | 3.05  | 6.34 |
| H11      | CK18        | ERG11     | 23.71 | 23.62   | 0.22     | Target    | H10       |       | 2.85E-02 | 5.15E-03    | SYBR Green I | None    | 3.1   | 6.38 |
| H12      | CK18        | ERG11     | 23.37 | 23.62   | 0.22     | Target    | H10       |       | 3.61E-02 | 6.52E-03    | SYBR Green I | None    | 3.12  | 6.39 |
