# Supplementary material for: Overexpression of Both ERG11 and ABC2 Genes Might Be Responsible for Itraconazole Resistance in Clinical Isolates of Candida krusei
Source: PLoS One. 2015 Aug 26;10(8):e0136185. doi: 10.1371/journal.pone.0136185 (PMC4550294; doi:10.1371/journal.pone.0136185)
Supplement: S1 Table — Ratio: the target gene ABC1 mRNA levels relative to the reference gene ACT1. (PDF) [file pone.0136185.s001.pdf]

| Position | Sample | Name | Gene  | Name  | Cq   | Cq        | Mean | Cq       | Error    | Gene | Type  | Replicate | Group   | Ratio | Ratio | Error | Dye | Failure | Slope | EPF |
|----------|--------|------|-------|-------|------|-----------|------|----------|----------|------|-------|-----------|---------|-------|-------|-------|-----|---------|-------|-----|
| A1       | CK1    | ACT1 | 18.83 | 18.7  | 0.23 | Reference | A1   | -        | -        | SYBR | Green | I         | None    | 3.31  | 7.02  |       |     |         |       |     |
| A2       | CK1    | ACT1 | 18.83 | 18.7  | 0.23 | Reference | A1   | -        | -        | SYBR | Green | I         | None    | 3.41  | 7.02  |       |     |         |       |     |
| A3       | CK1    | ACT1 | 18.44 | 18.7  | 0.23 | Reference | A1   | -        | -        | SYBR | Green | I         | None    | 3.44  | 7.05  |       |     |         |       |     |
| A4       | CK2    | ACT1 | 16.2  | 16.4  | 0.23 | Reference | A4   | -        | -        | SYBR | Green | I         | None    | 2.97  | 6.85  |       |     |         |       |     |
| A5       | CK2    | ACT1 | 16.36 | 16.4  | 0.23 | Reference | A4   | -        | -        | SYBR | Green | I         | None    | 2.96  | 6.8   |       |     |         |       |     |
| A6       | CK2    | ACT1 | 16.65 | 16.4  | 0.23 | Reference | A4   | -        | -        | SYBR | Green | I         | None    | 2.84  | 6.76  |       |     |         |       |     |
| A7       | CK4    | ACT1 | 16.91 | 16.73 | 0.33 | Reference | A7   | -        | -        | SYBR | Green | I         | None    | 3.41  | 7.12  |       |     |         |       |     |
| A8       | CK4    | ACT1 | 16.35 | 16.73 | 0.33 | Reference | A7   | -        | -        | SYBR | Green | I         | None    | 2.99  | 6.89  |       |     |         |       |     |
| A9       | CK4    | ACT1 | 16.92 | 16.73 | 0.33 | Reference | A7   | -        | -        | SYBR | Green | I         | None    | 3.09  | 6.91  |       |     |         |       |     |
| A10      | CK5    | ACT1 | 18.66 | 18.8  | 0.2  | Reference | A10  | -        | -        | SYBR | Green | I         | None    | 3.05  | 6.94  |       |     |         |       |     |
| A11      | CK5    | ACT1 | 18.94 | 18.8  | 0.2  | Reference | A10  | -        | -        | SYBR | Green | I         | None    | 3.28  | 6.94  |       |     |         |       |     |
| A12      | CK5    | ACT1 | -     | -     | -    | Reference | A10  | -        | -        | SYBR | Green | I         | Failure | 0.1   | 0.43  |       |     |         |       |     |
| B1       | CK1    | ABC1 | 23.55 | 23.17 | 0.33 | Target    | B1   | 3.47E-02 | 5.41E-03 | SYBR | Green | I         | None    | 4.11  | 7.02  |       |     |         |       |     |
| B2       | CK1    | ABC1 | 22.95 | 23.17 | 0.33 | Target    | B1   | 5.26E-02 | 8.20E-03 | SYBR | Green | I         | None    | 4.01  | 6.87  |       |     |         |       |     |
| B3       | CK1    | ABC1 | 23.02 | 23.17 | 0.33 | Target    | B1   | 5.01E-02 | 7.81E-03 | SYBR | Green | I         | None    | 3.86  | 6.8   |       |     |         |       |     |
| B4       | CK2    | ABC1 | 19.95 | 19.85 | 0.09 | Target    | B4   | 8.56E-02 | 1.35E-02 | SYBR | Green | I         | None    | 3.44  | 6.68  |       |     |         |       |     |
| B5       | CK2    | ABC1 | 19.82 | 19.85 | 0.09 | Target    | B4   | 9.36E-02 | 1.48E-02 | SYBR | Green | I         | None    | 3     | 6.36  |       |     |         |       |     |
| B6       | CK2    | ABC1 | 19.78 | 19.85 | 0.09 | Target    | B4   | 9.63E-02 | 1.52E-02 | SYBR | Green | I         | None    | 3     | 6.46  |       |     |         |       |     |
| B7       | CK4    | ABC1 | 19.5  | 19.21 | 0.26 | Target    | B7   | 1.46E-01 | 3.31E-02 | SYBR | Green | I         | None    | 3.87  | 7.09  |       |     |         |       |     |
| B8       | CK4    | ABC1 | 19.03 | 19.21 | 0.26 | Target    | B7   | 2.03E-01 | 4.58E-02 | SYBR | Green | I         | None    | 3.95  | 7.09  |       |     |         |       |     |
| B9       | CK4    | ABC1 | 19.09 | 19.21 | 0.26 | Target    | B7   | 1.94E-01 | 4.40E-02 | SYBR | Green | I         | None    | 3.93  | 7.09  |       |     |         |       |     |
| B10      | CK5    | ABC1 | 23.76 | 23.85 | 0.2  | Target    | B10  | 3.21E-02 | 4.41E-03 | SYBR | Green | I         | None    | 3.58  | 6.65  |       |     |         |       |     |
| B11      | CK5    | ABC1 | 24.08 | 23.85 | 0.2  | Target    | B10  | 2.57E-02 | 3.53E-03 | SYBR | Green | I         | None    | 3.62  | 6.65  |       |     |         |       |     |
| B12      | CK5    | ABC1 | 23.71 | 23.85 | 0.2  | Target    | B10  | 3.33E-02 | 4.57E-03 | SYBR | Green | I         | None    | 3.47  | 6.56  |       |     |         |       |     |
| C1       | CK6    | ACT1 | 18.48 | 18.61 | 0.17 | Reference | C1   | -        | -        | SYBR | Green | I         | None    | 3.17  | 6.86  |       |     |         |       |     |
| C2       | CK6    | ACT1 | 18.55 | 18.61 | 0.17 | Reference | C1   | -        | -        | SYBR | Green | I         | None    | 3.31  | 6.88  |       |     |         |       |     |
| C3       | CK6    | ACT1 | 18.8  | 18.61 | 0.17 | Reference | C1   | -        | -        | SYBR | Green | I         | None    | 3.13  | 7     |       |     |         |       |     |
| C4       | CK8    | ACT1 | 18.53 | 18.47 | 0.05 | Reference | C4   | -        | -        | SYBR | Green | I         | None    | 2.56  | 6.37  |       |     |         |       |     |
| C5       | CK8    | ACT1 | 18.45 | 18.47 | 0.05 | Reference | C4   | -        | -        | SYBR | Green | I         | None    | 2.73  | 6.57  |       |     |         |       |     |
| C6       | CK8    | ACT1 | 18.43 | 18.47 | 0.05 | Reference | C4   | -        | -        | SYBR | Green | I         | None    | 2.98  | 6.7   |       |     |         |       |     |
| C7       | CK9    | ACT1 | 18.65 | 18.76 | 0.18 | Reference | C7   | -        | -        | SYBR | Green | I         | None    | 3.18  | 6.89  |       |     |         |       |     |
| C8       | CK9    | ACT1 | 18.96 | 18.76 | 0.18 | Reference | C7   | -        | -        | SYBR | Green | I         | None    | 3.28  | 7.02  |       |     |         |       |     |
| C9       | CK9    | ACT1 | 18.66 | 18.76 | 0.18 | Reference | C7   | -        | -        | SYBR | Green | I         | None    | 3.27  | 6.92  |       |     |         |       |     |
| C10      | CK10   | ACT1 | 18.29 | 18.35 | 0.11 | Reference | C10  | -        | -        | SYBR | Green | I         | None    | 3.09  | 6.81  |       |     |         |       |     |
| C11      | CK10   | ACT1 | 18.47 | 18.35 | 0.11 | Reference | C10  | -        | -        | SYBR | Green | I         | None    | 2.83  | 6.66  |       |     |         |       |     |
| C12      | CK10   | ACT1 | 18.28 | 18.35 | 0.11 | Reference | C10  | -        | -        | SYBR | Green | I         | None    | 2.63  | 6.49  |       |     |         |       |     |
| D1       | CK6    | ABC1 | 22.99 | 22.96 | 0.08 | Target    | D1   | 4.80E-02 | 5.60E-03 | SYBR | Green | I         | None    | 3.8   | 6.89  |       |     |         |       |     |
| D2       | CK6    | ABC1 | 23.02 | 22.96 | 0.08 | Target    | D1   | 4.70E-02 | 5.49E-03 | SYBR | Green | I         | None    | 3.78  | 6.75  |       |     |         |       |     |
| D3       | CK6    | ABC1 | 22.87 | 22.96 | 0.08 | Target    | D1   | 5.22E-02 | 6.09E-03 | SYBR | Green | I         | None    | 3.75  | 6.79  |       |     |         |       |     |
| D4       | CK8    | ABC1 | 23.31 | 23.37 | 0.18 | Target    | D4   | 3.49E-02 | 1.28E-03 | SYBR | Green | I         | None    | 2.87  | 6.42  |       |     |         |       |     |
| D5       | CK8    | ABC1 | 23.23 | 23.37 | 0.18 | Target    | D4   | 3.69E-02 | 1.35E-03 | SYBR | Green | I         | None    | 3.34  | 6.62  |       |     |         |       |     |
| D6       | CK8    | ABC1 | 23.58 | 23.37 | 0.18 | Target    | D4   | 2.90E-02 | 1.06E-03 | SYBR | Green | I         | None    | 3.43  | 6.56  |       |     |         |       |     |
| D7       | CK9    | ABC1 | 24.15 | 24.44 | 0.49 | Target    | D7   | 2.38E-02 | 2.91E-03 | SYBR | Green | I         | None    | 1.67  | 5.47  |       |     |         |       |     |
| D8       | CK9    | ABC1 | 24.16 | 24.44 | 0.49 | Target    | D7   | 2.36E-02 | 2.89E-03 | SYBR | Green | I         | None    | 3.71  | 6.66  |       |     |         |       |     |
| D9       | CK9    | ABC1 | 24.16 | 24.44 | 0.49 | Target    | D7   | 2.36E-02 | 2.89E-03 | SYBR | Green | I         | None    | 3.56  | 6.62  |       |     |         |       |     |
| D10      | CK10   | ABC1 | 23.63 | 23.34 | 0.3  | Target    | D10  | 2.57E-02 | 1.90E-03 | SYBR | Green | I         | None    | 3.72  | 6.83  |       |     |         |       |     |
| D11      | CK10   | ABC1 | 23.35 | 23.34 | 0.3  | Target    | D10  | 3.12E-02 | 2.31E-03 | SYBR | Green | I         | None    | 3.4   | 6.62  |       |     |         |       |     |
| D12      | CK10   | ABC1 | 23.03 | 23.34 | 0.3  | Target    | D10  | 3.89E-02 | 2.89E-03 | SYBR | Green | I         | None    | 3.08  | 6.41  |       |     |         |       |     |
| E1       | CK11   | ACT1 | 18.28 | 18.26 | 0.1  | Reference | E1   | -        | -        | SYBR | Green | I         | None    | 2.61  | 6.56  |       |     |         |       |     |
| E2       | CK11   | ACT1 | 18.16 | 18.26 | 0.1  | Reference | E1   | -        | -        | SYBR | Green | I         | None    | 2.7   | 6.62  |       |     |         |       |     |
| E3       | CK11   | ACT1 | 18.35 | 18.26 | 0.1  | Reference | E1   | -        | -        | SYBR | Green | I         | None    | 2.83  | 6.77  |       |     |         |       |     |
| E4       | CK12   | ACT1 | 17.19 | 16.94 | 0.22 | Reference | E4   | -        | -        | SYBR | Green | I         | None    | 2.91  | 6.71  |       |     |         |       |     |
| E5       | CK12   | ACT1 | 16.87 | 16.94 | 0.22 | Reference | E4   | -        | -        | SYBR | Green | I         | None    | 2.66  | 6.62  |       |     |         |       |     |
| E6       | CK12   | ACT1 | 16.77 | 16.94 | 0.22 | Reference | E4   | -        | -        | SYBR | Green | I         | None    | 2.66  | 6.62  |       |     |         |       |     |
| E7       | CK13   | ACT1 | 17.6  | 17.56 | 0.05 | Reference | E7   | -        | -        | SYBR | Green | I         | None    | 2.95  | 6.86  |       |     |         |       |     |
| E8       | CK13   | ACT1 | 17.5  | 17.56 | 0.05 | Reference | E7   | -        | -        | SYBR | Green | I         | None    | 2.58  | 6.52  |       |     |         |       |     |
| E9       | CK13   | ACT1 | 17.57 | 17.56 | 0.05 | Reference | E7   | -        | -        | SYBR | Green | I         | None    | 2.53  | 6.38  |       |     |         |       |     |
| E10      | CK14   | ACT1 | 17    | 17.13 | 0.34 | Reference | E10  | -        | -        | SYBR | Green | I         | None    | 2.81  | 6.66  |       |     |         |       |     |
| E11      | CK14   | ACT1 | 16.87 | 17.13 | 0.34 | Reference | E10  | -        | -        | SYBR | Green | I         | None    | 2.78  | 6.63  |       |     |         |       |     |
| E12      | CK14   | ACT1 | 17.52 | 17.13 | 0.34 | Reference | E10  | -        | -        | SYBR | Green | I         | None    | 2.88  | 6.74  |       |     |         |       |     |
| F1       | CK11   | ABC1 | 24.18 | 24.1  | 0.17 | Target    | F1   | 1.65E-02 | 8.06E-03 | SYBR | Green | I         | None    | 3.26  | 6.49  |       |     |         |       |     |
| F2       | CK11   | ABC1 | 24.21 | 24.1  | 0.17 | Target    | F1   | 1.61E-02 | 7.89E-03 | SYBR | Green | I         | None    | 3.29  | 6.56  |       |     |         |       |     |
| F3       | CK11   | ABC1 | 23.9  | 24.1  | 0.17 | Target    | F1   | 2.00E-02 | 9.78E-03 | SYBR | Green | I         | None    | 3.43  | 6.61  |       |     |         |       |     |
| F4       | CK12   | ABC1 | 22.9  | 23.01 | 0.28 | Target    | F4   | 1.61E-02 | 2.45E-03 | SYBR | Green | I         | None    | 3.2   | 6.46  |       |     |         |       |     |
| F5       | CK12   | ABC1 | 23.33 | 23.01 | 0.28 | Target    | F4   | 1.20E-02 | 1.82E-03 | SYBR | Green | I         | None    | 3.33  | 6.64  |       |     |         |       |     |
| F6       | CK12   | ABC1 | 22.81 | 23.01 | 0.28 | Target    | F4   | 1.71E-02 | 2.61E-03 | SYBR | Green | I         | None    | 3.2   | 6.45  |       |     |         |       |     |
| F7       | CK13   | ABC1 | 21.75 | 21.8  | 0.22 | Target    | F7   | 5.47E-02 | 1.94E-03 | SYBR | Green | I         | None    | 3.39  | 6.61  |       |     |         |       |     |
| F8       | CK13   | ABC1 | 22.04 | 21.8  | 0.22 | Target    | F7   | 4.47E-02 | 1.59E-03 | SYBR | Green | I         | None    | 3.31  | 6.6   |       |     |         |       |     |
| F9       | CK13   | ABC1 | 21.61 | 21.8  | 0.22 | Target    | F7   | 6.02E-02 | 2.14E-03 | SYBR | Green | I         | None    | 2.9   | 6.28  |       |     |         |       |     |
| F10      | CK14   | ABC1 | 20.89 |       |      |           |      |          |          |      |       |           |         |       |       |       |     |         |       |     |
